# Supplementary material for: Membership and Behavior of Ultra-Low-Diversity Pathogen Communities Present in the Gut of Humans during Prolonged Critical Illness
Source: PubMed Central journal article supplement — mBio. 2014 Sep 23;5(5):e01361-14. doi: 10.1128/mBio.01361-14 (PMC4173762; doi:10.1128/mbio.01361-14), 2014-09-23
Supplement: mbo005141999sf1.pdf [file mbo005141999sf1.pdf]

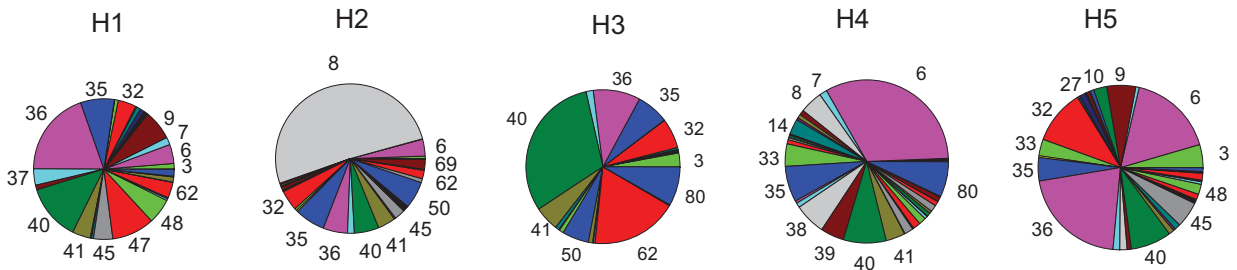

- 3** p\_Actinobacteria;c\_Actinobacteria;o\_Bifidobacteriales;f\_Bifidobacteriaceae;g\_Bifidobacterium
- 6** p\_Bacteroidetes;c\_Bacteroidia;o\_Bacteroidales;f\_Bacteroidaceae;g\_Bacteroides
- 7** p\_Bacteroidetes;c\_Bacteroidia;o\_Bacteroidales;f\_Porphyrimonadaceae;g\_Parabacteroides
- 8** p\_Bacteroidetes;c\_Bacteroidia;o\_Bacteroidales;f\_Prevotellaceae;g\_Prevotella
- 9** p\_Bacteroidetes;c\_Bacteroidia;o\_Bacteroidales;f\_Rikenellaceae;g\_\_
- 10** p\_Bacteroidetes;c\_Bacteroidia;o\_Bacteroidales;f\_S24-7;g\_\_
- 27** p\_Firmicutes;c\_Clostridia;o\_Clostridiales;f\_\_;g\_\_
- 32** p\_Firmicutes;c\_Clostridia;o\_Clostridiales;f\_Lachnospiraceae;Other
- 33** p\_Firmicutes;c\_Clostridia;o\_Clostridiales;f\_Lachnospiraceae;g\_\_
- 35** p\_Firmicutes;c\_Clostridia;o\_Clostridiales;f\_Lachnospiraceae;g\_Blautia
- 36** p\_Firmicutes;c\_Clostridia;o\_Clostridiales;f\_Lachnospiraceae;g\_Coprococcus
- 37** p\_Firmicutes;c\_Clostridia;o\_Clostridiales;f\_Lachnospiraceae;g\_Dorea
- 38** p\_Firmicutes;c\_Clostridia;o\_Clostridiales;f\_Lachnospiraceae;g\_Lachnobacterium
- 39** p\_Firmicutes;c\_Clostridia;o\_Clostridiales;f\_Lachnospiraceae;g\_Lachnospira
- 40** p\_Firmicutes;c\_Clostridia;o\_Clostridiales;f\_Lachnospiraceae;g\_Roseburia
- 41** p\_Firmicutes;c\_Clostridia;o\_Clostridiales;f\_Lachnospiraceae;g\_[Ruminococcus]
- 45** p\_Firmicutes;c\_Clostridia;o\_Clostridiales;f\_Ruminococcaceae;g\_\_
- 47** p\_Firmicutes;c\_Clostridia;o\_Clostridiales;f\_Ruminococcaceae;g\_Oscillospira
- 48** p\_Firmicutes;c\_Clostridia;o\_Clostridiales;f\_Ruminococcaceae;g\_Ruminococcus
- 50** p\_Firmicutes;c\_Clostridia;o\_Clostridiales;f\_Veillonellaceae;g\_Dialister
- 62** p\_Firmicutes;c\_Erysipelotrichi;o\_Erysipelotrichales;f\_[Coprobacillaceae];g\_\_
- 69** p\_Proteobacteria;c\_Betaproteobacteria;o\_Burkholderiales;f\_Alcaligenaceae;g\_Sutterella
- 80** p\_Verrucomicrobia;c\_Verrucomicrobiae;o\_Verrucomicrobiales;f\_Verrucomicrobiaceae;g\_Akkermansia

**Supplemental Fig.S1. The taxonomic composition at genus level of gut microbiome** determined by 16S rRNA analysis of stool samples collected from healthy volunteers. Top 7 genera of *Coprococcus* (#36, p\_Firmicutes, f\_Lachnospiraceae), *Bacteroides* (#6, p\_Bacteroidetes, f\_Bacteroidaceae), *Roseburia* (#40, p\_Firmicutes, f\_Lachnospiraceae), *Prevotella* (#8, p\_Bacteroidetes, f\_Prevotellaceae), non-identifies genus of f\_Lachnospiraceae (#32, p\_Firmicutes), non-identifies genus of f\_Coprobacillaceae (#62, p\_Firmicutes), *Blautia* (#35, p\_Firmicutes, f\_Lachnospiraceae).
