# Supplementary material for: Membership and Behavior of Ultra-Low-Diversity Pathogen Communities Present in the Gut of Humans during Prolonged Critical Illness
Source: PubMed Central journal article supplement — mBio. 2014 Sep 23;5(5):e01361-14. doi: 10.1128/mBio.01361-14 (PMC4173762; doi:10.1128/mbio.01361-14), 2014-09-23
Supplement: mbo005141999sf2.pdf [file mbo005141999sf2.pdf]

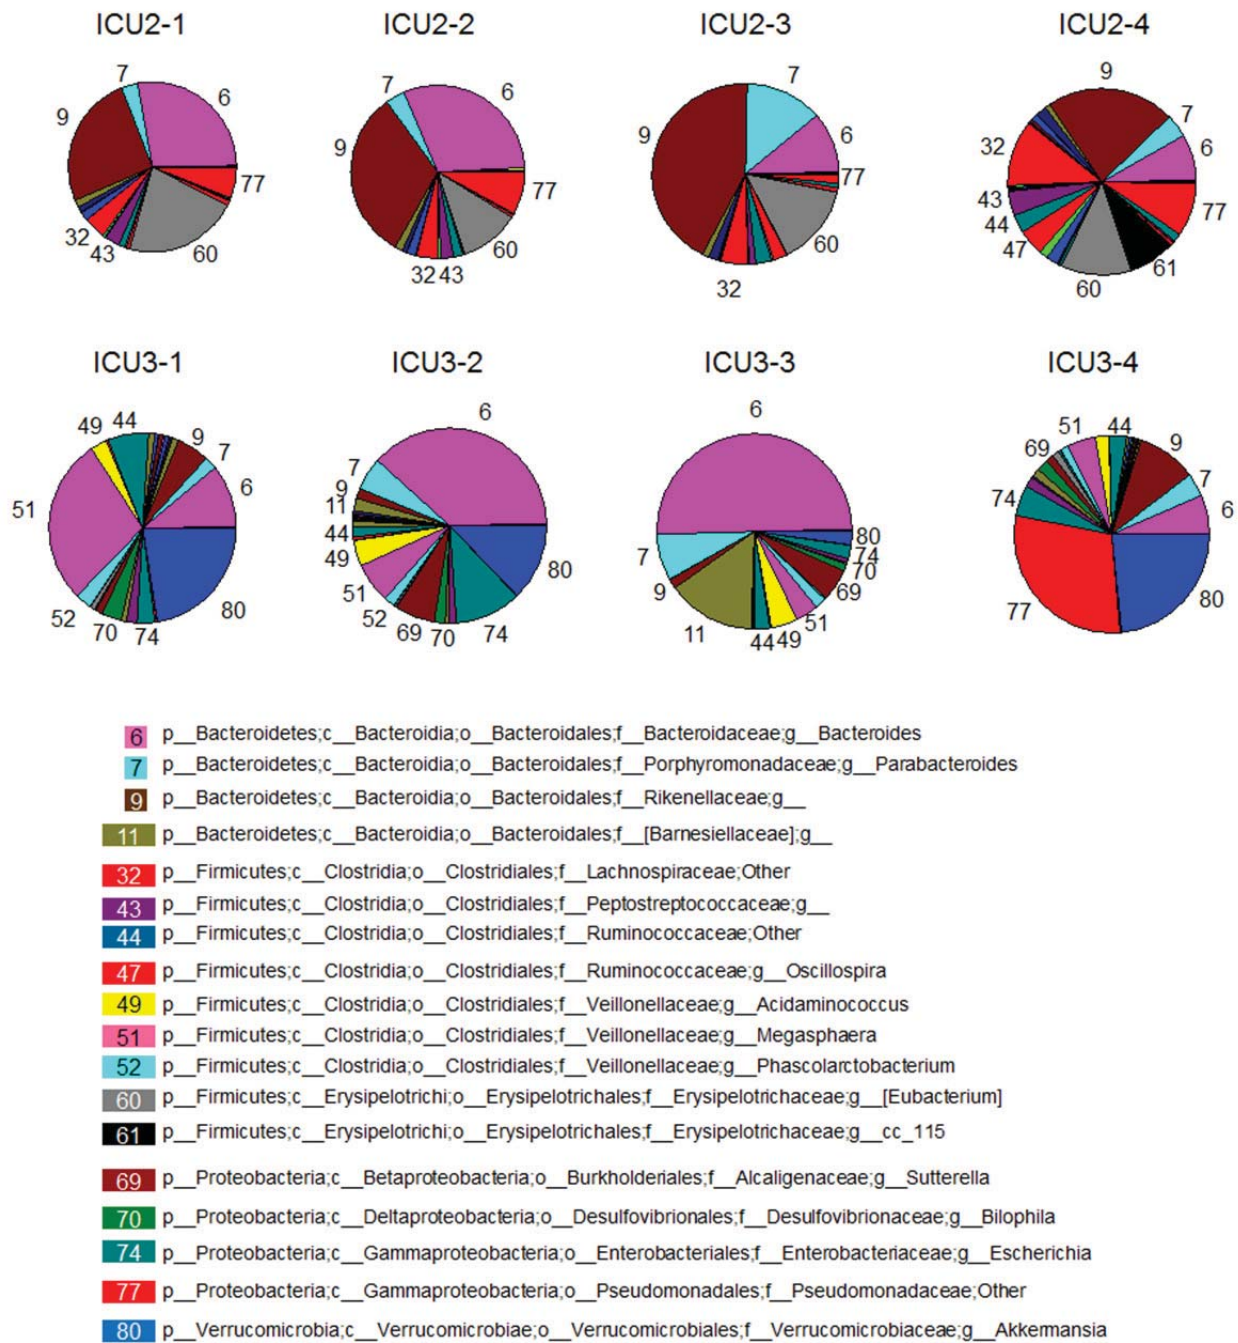

**Supplemental Fig.S2. The taxonomic composition of gut microbiome in stool samples collected from ICU2 and ICU3 patients. *Pseudomonadaceae* (#77) reached 10% (ICU2-4) and 30% (ICU3-4).**
