# Supplementary material for: Membership and Behavior of Ultra-Low-Diversity Pathogen Communities Present in the Gut of Humans during Prolonged Critical Illness
Source: PubMed Central journal article supplement — mBio. 2014 Sep 23;5(5):e01361-14. doi: 10.1128/mBio.01361-14 (PMC4173762; doi:10.1128/mbio.01361-14), 2014-09-23
Supplement: mbo005141999sf4.pdf [file mbo005141999sf4.pdf]

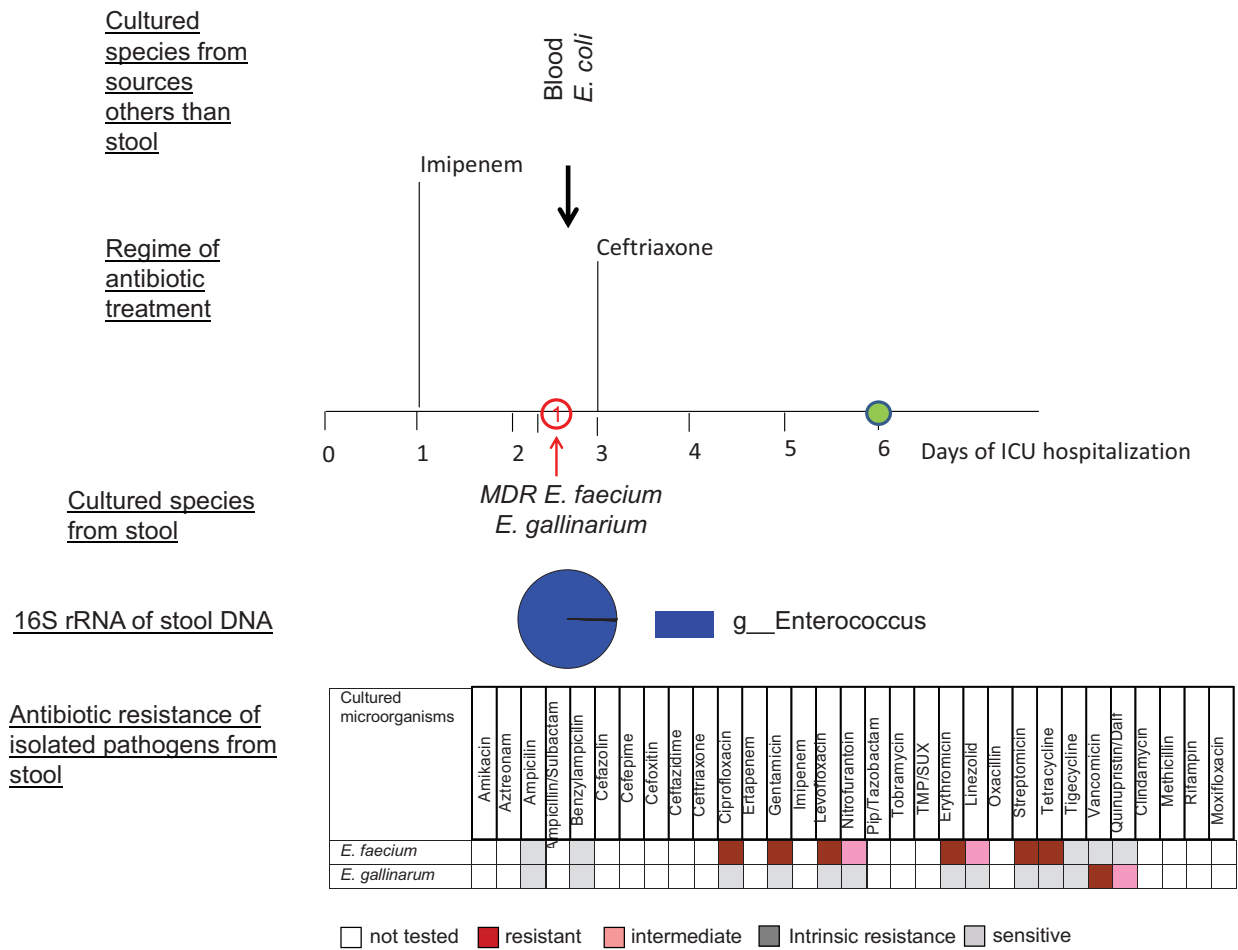

**Supplemental Fig.S4. Taxonomic and culturing composition of the ICU4 communities in correlation to antibiotic regimen, antibiotic resistance of stool isolates, and microbial data of cultured species from non-intestinal samples.**
