# Supplementary material for: Membership and Behavior of Ultra-Low-Diversity Pathogen Communities Present in the Gut of Humans during Prolonged Critical Illness
Source: PubMed Central journal article supplement — mBio. 2014 Sep 23;5(5):e01361-14. doi: 10.1128/mBio.01361-14 (PMC4173762; doi:10.1128/mbio.01361-14), 2014-09-23
Supplement: mbo005141999sf6.pdf [file mbo005141999sf6.pdf]

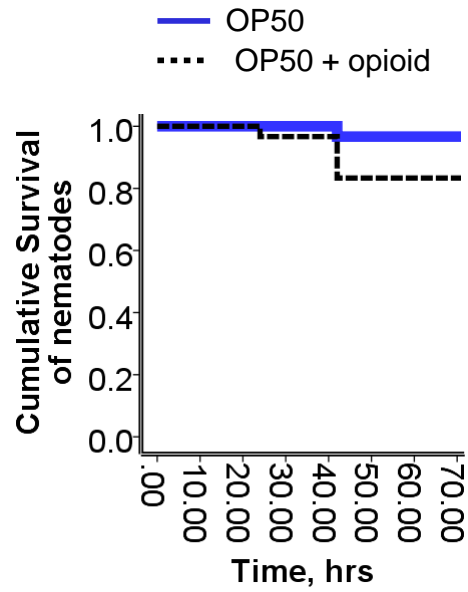

Supplemental Fig.S6. Kaplan-Meier survival curves of *C. elegans* fed on *E. coli* OP50 with and without exposure to opioid (50  $\mu$ M U-50,488). n=10/plate, 3 plates/group.
